# Supplementary material for: Clinoenstatite/Tantalum Coating for Enhancement of Biocompatibility and Corrosion Protection of Mg Alloy
Source: PubMed Central journal article supplement (PMC7353525; doi:10.3390/jfb11020026), 2020-04-13
Supplement: jfb-11-00026-s001.pdf [file jfb-11-00026-s001.pdf]

## Supporting Information

**S1 Clinoenstatite preparation:** Clinoenstatite powders were prepared by precipitation process using magnesium nitrate ( $\text{Mg}(\text{NO}_3)_2 \cdot 6\text{H}_2\text{O}$ ) and sodium silicate ( $\text{Na}_2\text{SiO}_3 \cdot 9\text{H}_2\text{O}$ ) as raw materials (molar ratio:  $\text{Mg}(\text{NO}_3)_2 \cdot 6\text{H}_2\text{O}/\text{Na}_2\text{SiO}_3 \cdot 9\text{H}_2\text{O} = 1:1$ ). Each raw material was dissolved in water with a concentration of 0.5 mol/L. Magnesium nitrate solution was added into sodium silicate solution dropwise. After the precipitation process, the suspension was filtered and washed with distilled water and ethanol, and dried at 60 °C for 2 days to obtain the dry powders. The dry powders were sieved through a 250 mesh screen, and calcined at 1300 °C. In order to fabricate nanostructured CLT, the powder was milled in a planetary ball mill (Retsch PM400) under the conditions which listed in Table 1.

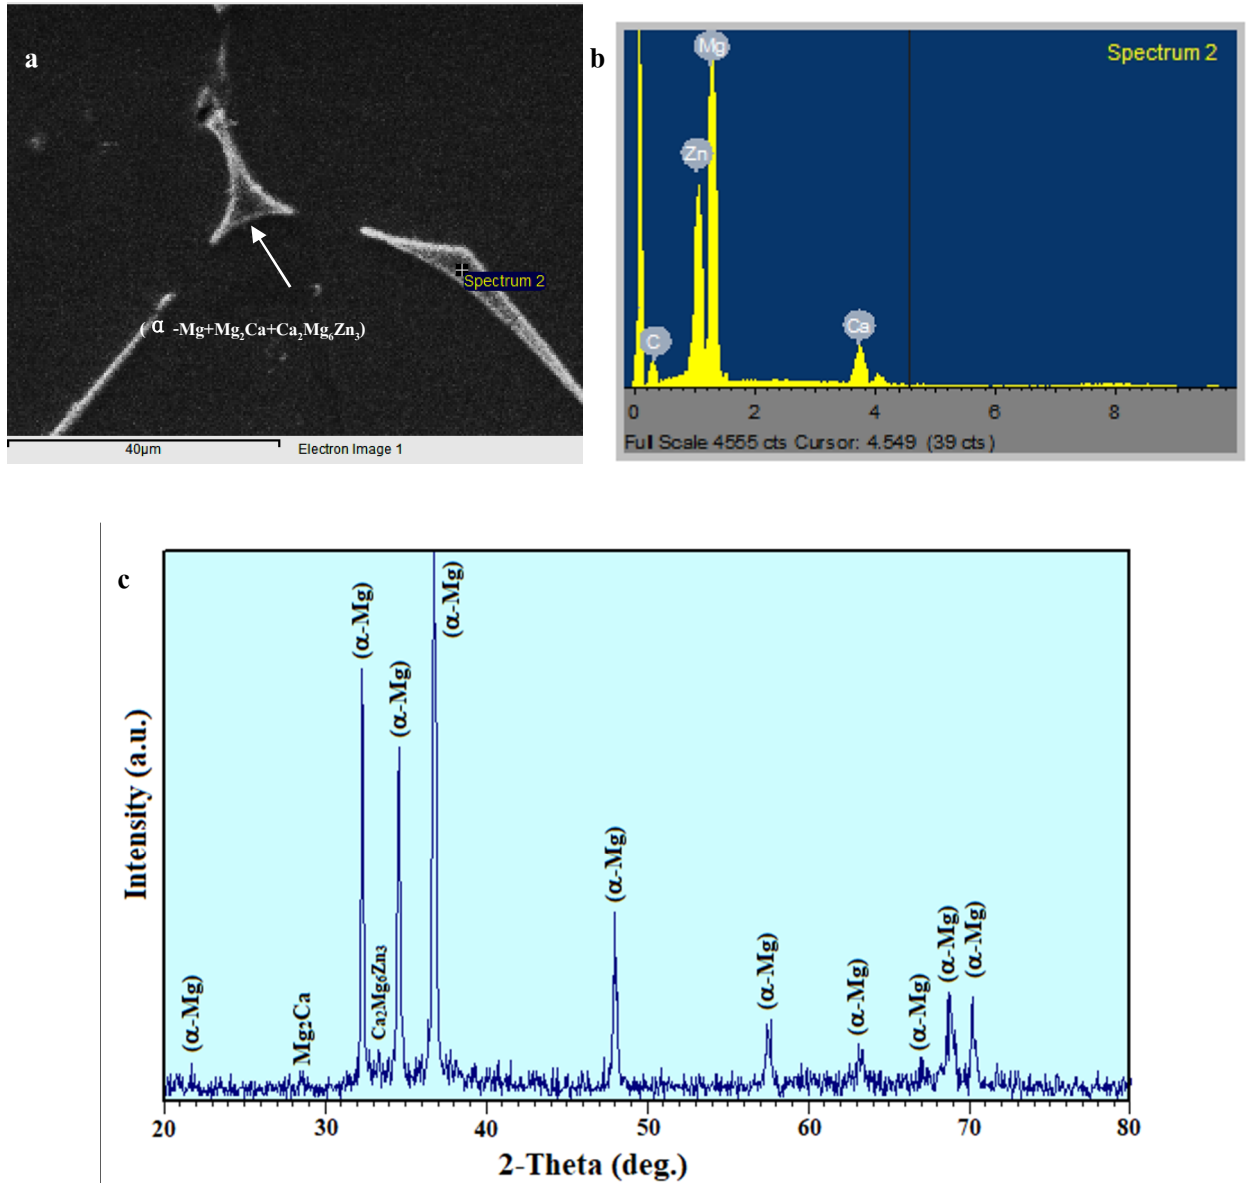

**Figure S1.** (a) SEM images of as-cast Mg-1Ca-3Zn alloy, (b) EDS analysis of Mg-1Ca-3Zn alloys (Spectrum 2) and (c) X-ray diffraction pattern of Mg-1Ca-3Zn alloys.

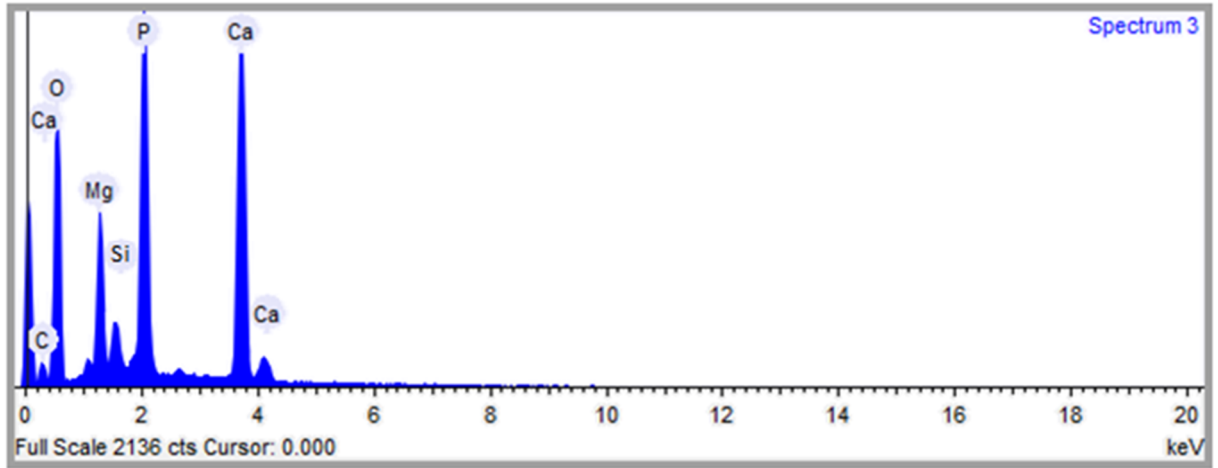

**Figure S2.** EDS spectrum of the cross-section of CLT coated-sample after immersion into SBF for 14 days.
